# Supplementary material for: Antifouling Conductive Composite Membrane with Reversible Wettability for Wastewater Treatment
Source: MDPI journal article supplement (doi:10.3390/membranes12060626), 2022-06-16
Supplement: s1 [file s1]

# Supporting Information

## **Antifouling conductive composite membrane with reversible wettability for wastewater treatment**

Yi Li<sup>1,2</sup>, Ruonan Gao<sup>1,2</sup>, Jianwen Zhang<sup>1,2</sup>, Yue Zhang<sup>1,2</sup> and Shuai Liang<sup>1,2,\*</sup>

<sup>1</sup> Beijing Key Lab for Source Control Technology of Water Pollution, College of Environmental Science and Engineering, Beijing Forestry University, Beijing 100083, China

<sup>2</sup> Engineering Research Center for Water Pollution Source Control & Eco-remediation, College of Environmental Science and Engineering, Beijing Forestry University, Beijing 100083, China

\*Corresponding author. Tel.: +86 (10) 6233 6675; fax: +86 (10) 6233 6596.

E-mail: shuai\_liang@bjfu.edu.cn

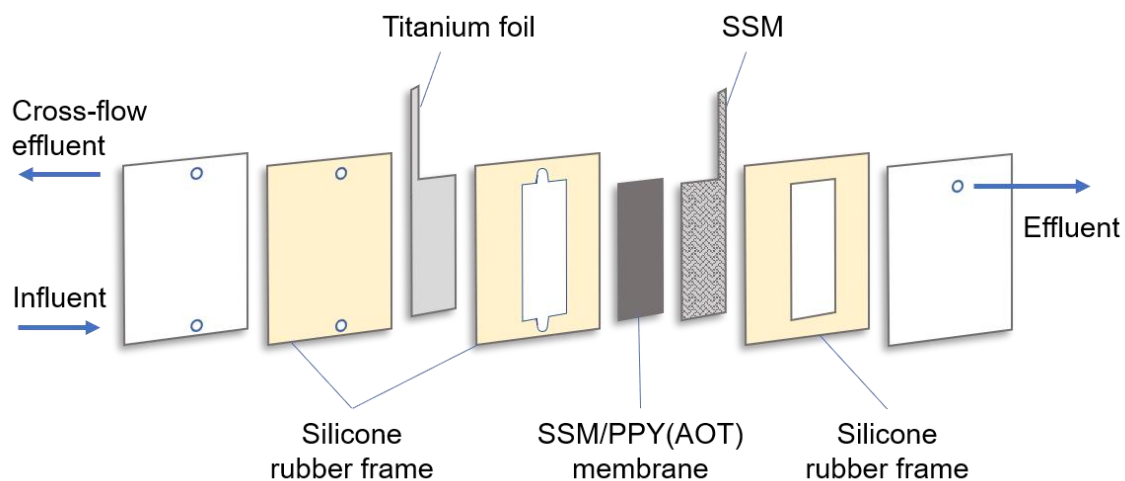

**Figure S1.** Configuration diagram of the cross-flow filtration cell used in the antifouling filtration experiments.

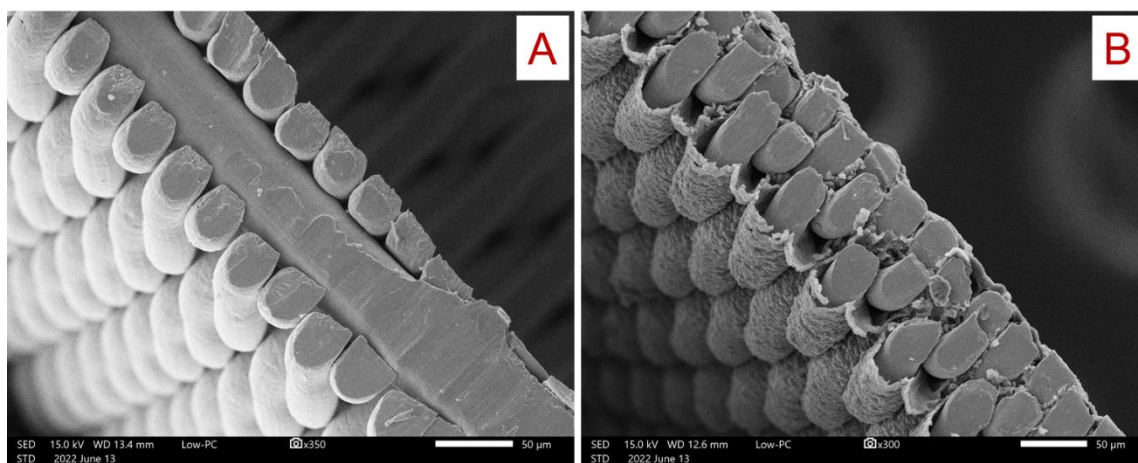

**Figure S2.** SEM images of cross sections of the (A) SSM and (B) SSM/PPY(AOT) membrane.

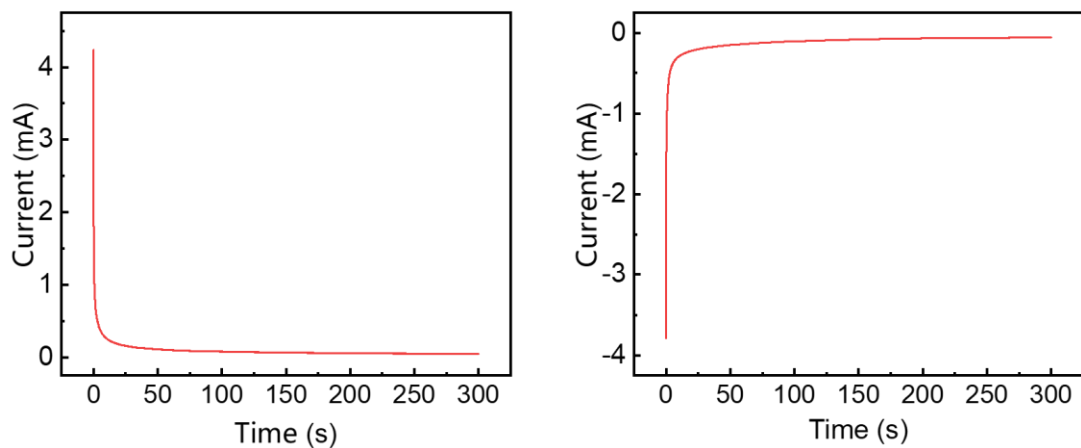

**Figure S3.** Current-time curves of the oxidation and reduction processes for the SSM/PPY(AOT) membrane.

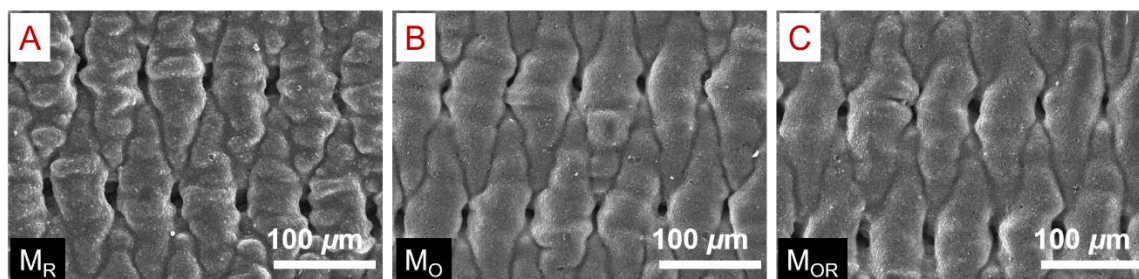

**Figure S4.** SEM views of the (A) fouled membrane in the M<sub>R</sub> mode, (B) fouled membrane in the M<sub>O</sub> mode, and (C) fouled membrane in the M<sub>OR</sub> mode.
